# Supplementary material
Source: publisher site journal article supplement (https://www.spandidos-publications.com/5059/downloadSupplementary)
Supplement: Supplementary file 1 [file downloadSupplementary]

## Sheet: Sheet1
Table SI. Top 50 up-regulated and 50 down-regulated methylation genes in AD mouse models (ranked according to fold-change) .
bed format information of differentially methylated RNA sites								differentially methylated RNA					comparison information				Annotations
chrom	txStart	txEnd		PeakID		score		Peak_length		circRNA			Foldchange	P_value	FDR	Regulation	circBaseID		source	best_transcript		GeneName	Catalog		predicted_sequence_length
chr15	57821681	57822060		diffreps_peak_12777		7.54426		379		chr15:57821032-57823751+			2350.2	2.85586e-08	2.20018e-07	up			novel	NM_199449		Zhx2	exonic		2720
chr14	56552961	56553420		diffreps_peak_11116		11.5217		459		chr14:56532236-56565167-			1848.8	3.00782e-12	5.41956e-10	up			novel	NM_001014996		Cenpj	exonic		3556
chr13	96496781	96496842		diffreps_peak_10001		8.25794		61		chr13:96493829-96508364-			1811.4	5.52148e-09	9.51574e-08	up			novel	NM_012048		Polk	exonic		971
chr8	78577181	78577460		diffreps_peak_34937		8.58322		279		chr8:78515586-78589249+			1554.7	2.61082e-09	9.51574e-08	up	8_81113148_81039485_-73663|16.06|7|10		PMID:25714049	NM_029736		Slc10a7	sense overlapping		73664
chr7	118791367	118791460		diffreps_peak_33295		8.52386		93		chr7:118790010-118794595+			1486	2.9932e-09	9.51574e-08	up			novel	NM_027815		9030624J02Rik	exonic		330
chr17	55491381	55491880		diffreps_peak_16066		8.05262		499		chr17:55490943-55510444+			1425.2	8.85885e-09	1.14329e-07	up	17_55649742_55630241_-19501|17.07|14|41		PMID:25714049	NM_172829		St6gal2	sense overlapping		19502
chr12	71977501	71978000		diffreps_peak_7915		8.43759		499		chr12:71971094-71989840+			1416.3	3.65096e-09	9.51574e-08	up	12_73090827_73072081_-18746|14.27|4|54		PMID:25714049	NM_026102		Daam1	sense overlapping		18747
chr14	28338341	28338720		diffreps_peak_10681		8.46792		379		chr14:28317249-28384043+			1335.2	3.40468e-09	9.51574e-08	up	14_29197229_29130435_-66794|12.50|13|72		PMID:25714049	ENSMUST00000090302		Erc2	intronic		66795
chr3	152426241	152426740		diffreps_peak_24083		8.19564		499		chr3:152420015-152428847+			1256.5	6.37322e-09	1.05816e-07	up	3_152091811_152082979_-8832|16.11|15|22		PMID:25714049	NM_001080755		Zzz3	sense overlapping		8833
chr6	102422721	102422960		diffreps_peak_30629		8.25652		239		chr6:102420253-102501618-			1196.1	5.53961e-09	9.51574e-08	up	6_102451612_102370247_-81365|15.07|11|12		PMID:25714049	NM_008779		Cntn3	sense overlapping		81366
chr13	36243201	36243760		diffreps_peak_9127		8.58803		559		chr13:36207627-36246494+			1172.5	2.58211e-09	9.51574e-08	up	mmu_circ_0000452		circBase	NM_024274		Fars2	sense overlapping		38868
chr16	74928901	74928982		diffreps_peak_14833		8.10041		81		chr16:74928090-74928982-			1154.5	7.93572e-09	1.05816e-07	up			novel	TCONS_00012298		XLOC_009657	sense overlapping		893
chr9	95767401	95767680		diffreps_peak_37339		8.59444		279		chr9:95760886-95795866-			1133.2	2.54426e-09	9.51574e-08	up	9_95696285_95661305_-34980|13.97|5|8		PMID:25714049	NM_001033210		Pls1	sense overlapping		34981
chr16	94648901	94649180		diffreps_peak_15053		8.59396		279		chr16:94611419-94693138+			1022.4	2.54705e-09	9.51574e-08	up			novel	AK139493			intronic		81720
chr15	57940622	57940799		diffreps_peak_12784		8.43169		177		chr15:57922957-57951812+			984.5	3.70095e-09	9.51574e-08	up			novel	NM_001081396		Tbc1d31	exonic		1544
chr7	59332281	59332620		diffreps_peak_32283		8.57345		339		chr7:59276602-59334066-			950.9	2.67024e-09	9.51574e-08	up			novel	NR_015479		C230091D08Rik	sense overlapping		57465
chr13	92511477	92511856		diffreps_peak_9945		7.80432		379		chr13:92503939-92524338-			947.7	1.56921e-08	1.4575e-07	up	13_93294293_93273894_-20399|17.16|4|4		PMID:25714049	NM_173392		Zfyve16	exonic		3946
chr8	111118461	111118840		diffreps_peak_35383		8.25744		379		chr8:111101386-111135099+			941.5	5.52795e-09	9.51574e-08	up	8_113658999_113625286_-33713|18.81|5|9		PMID:25714049	NM_198308		Pdpr	sense overlapping		33714
chr11	80971463	80971614		diffreps_peak_6196		8.46268		151		chr11:80952480-80971614-			941	3.44604e-09	9.51574e-08	up	11_80785116_80765982_-19134|25.46|14|50		PMID:25714049	NM_007384		Asic2	exonic		279
chr14	47266980	47267040		diffreps_peak_10964		8.60917		60		chr14:47263439-47268762-			890.3	2.45939e-09	9.51574e-08	up			novel	NM_172598		Wdhd1	exonic		701
chr7	114493501	114493740		diffreps_peak_33238		8.61508		239		chr7:114491440-114536483+			826	2.42614e-09	9.51574e-08	up	7_121679997_121634954_-45043|13.44|5|6		PMID:25714049	NM_011055		Pde3b	sense overlapping		45044
chr5	71635401	71635620		diffreps_peak_27791		8.61967		219		chr5:71571632-71642326-			783.2	2.40065e-09	9.51574e-08	up			novel	NM_010251		Gabra4	sense overlapping		70695
chr11	22786261	22786480		diffreps_peak_5078		8.61967		219		chr11:22774891-22787249-			783.2	2.40065e-09	9.51574e-08	up	11_22687252_22674894_-12358|13.75|3|3		PMID:25714049	ENSMUST00000117244		Gm12057	sense overlapping		12359
chr6	8555001	8555380		diffreps_peak_29232		8.26148		379		chr6:8537817-8586036+			779	5.47671e-09	9.51574e-08	up			novel	NM_133236		Glcci1	sense overlapping		48220
chr5	139086901	139087120		diffreps_peak_28897		8.62484		219		chr5:139050658-139127785+			740.3	2.37222e-09	9.51574e-08	up			novel	NM_008923		Prkar1b	antisense		77128
chr17	46851961	46852260		diffreps_peak_15953		14.2325		299		chr17:46824450-46858698-			715.2	5.85458e-15	1.00274e-11	up	17_46995647_46961399_-34248|18.00|14|38		PMID:25714049	NM_001100452		Gltscr1l	sense overlapping		34249
chr19	26773181	26773380		diffreps_peak_18409		8.62965		199		chr19:26770938-26777438+			704.6	2.3461e-09	9.51574e-08	up	19_26851928_26845428_-6500|18.04|9|14		PMID:25714049	NM_011416		Smarca2	sense overlapping		6501
chr1	87371541	87371740		diffreps_peak_1291		8.63494		199		chr1:87364104-87380593+			668.9	2.31772e-09	9.51574e-08	up	1_89277168_89260679_-16489|18.81|6|14		PMID:25714049	NM_146112		Gigyf2	sense overlapping		16490
chr7	62034621	62035160		diffreps_peak_32385		8.26882		539		chr7:61974996-62070616-			595.2	5.38489e-09	9.51574e-08	up	7_69215502_69119882_-95620|17.18|4|7		PMID:25714049	NR_015599		A330076H08Rik	sense overlapping		95621
chr19	40312841	40313100		diffreps_peak_18607		8.26953		259		chr19:40309581-40324832-			574	5.37609e-09	9.51574e-08	up			novel	NM_009166		Sorbs1	sense overlapping		15252
chr2	49277161	49277520		diffreps_peak_19851		8.26073		359		chr2:49272041-49279976+			573.8	5.48613e-09	9.51574e-08	up	2_49135496_49127561_-7935|19.96|1|2		PMID:25714049	NM_029924		Mbd5	sense overlapping		7936
chr11	31039981	31040300		diffreps_peak_5225		8.26534		319		chr11:30996534-31061586+			566.8	5.42825e-09	9.51574e-08	up			novel	NM_023906		Asb3	sense overlapping		65053
chr15	44417281	44417500		diffreps_peak_12607		8.2653		219		chr15:44376508-44420873-			563.3	5.4288e-09	9.51574e-08	up	15_44252419_44208054_-44365|14.83|9|10		PMID:25714049	NM_026149		Nudcd1	sense overlapping		44366
chr6	115569441	115569840		diffreps_peak_30859		8.27034		399		chr6:115553991-115578244+			556.3	5.36607e-09	9.51574e-08	up			novel	NM_199033		Tsen2	sense overlapping		24254
chr9	81450921	81451300		diffreps_peak_37125		8.65997		379		chr9:81438085-81459221-			533.2	2.18791e-09	9.51574e-08	up			novel	AK139836			intronic		21137
chr16	4162281	4162660		diffreps_peak_13613		8.26709		379		chr16:4093486-4179930-			510.3	5.40642e-09	9.51574e-08	up			novel	NM_001025432		Crebbp	sense overlapping		86445
chr16	37215021	37215380		diffreps_peak_14243		8.26197		359		chr16:37200576-37225134-			510.2	5.47048e-09	9.51574e-08	up			novel	NM_172440		Stxbp5l	sense overlapping		24559
chr3	60816561	60817120		diffreps_peak_22793		8.64973		559		chr3:60781717-60853269-			501	2.24013e-09	9.51574e-08	up			novel	AK046572			sense overlapping		71553
chr16	21897861	21898120		diffreps_peak_13968		8.66788		259		chr16:21891884-21911122+			497.4	2.14841e-09	9.51574e-08	up			novel	NM_172821		Map3k13	sense overlapping		19239
chr5	86017701	86018060		diffreps_peak_27960		8.26846		359		chr5:86012261-86022483-			474.9	5.38944e-09	9.51574e-08	up			novel	NM_007683		Cenpc1	sense overlapping		10223
chr12	3628221	3628460		diffreps_peak_6979		8.67988		239		chr12:3576584-3648389+			447.4	2.08988e-09	9.51574e-08	up			novel	NM_007886		Dtnb	sense overlapping		71806
chr4	103087332	103087472		diffreps_peak_25646		8.27034		140		chr4:103087333-103103404-			428.9	5.36616e-09	9.51574e-08	up			novel	NM_146254		Wdr78	exonic		773
chr16	4149901	4150100		diffreps_peak_13612		8.2652		199		chr16:4093486-4179930-			404.1	5.42994e-09	9.51574e-08	up			novel	NM_001025432		Crebbp	sense overlapping		86445
chr4	99258641	99258703		diffreps_peak_25568		8.13173		62		chr4:99212577-99258703+			391.635	7.38371e-09	1.05816e-07	up	4_98925394_98879268_-46126|18.24|8|10		PMID:25714049	NM_175029		Atg4c	sense overlapping		46127
chr1	76125321	76125700		diffreps_peak_1148		8.70384		379		chr1:76094223-76140263+			354.6	1.97769e-09	9.51574e-08	up			novel				intergenic		46041
chr15	23146141	23146520		diffreps_peak_12273		8.26837		379		chr15:23113295-23173929+			340.5	5.39045e-09	9.51574e-08	up			novel	NM_001081299		Cdh18	sense overlapping		60635
chrX	157577741	157578100		diffreps_peak_39670		8.26911		359		chrX:157550932-157593873-			336.9	5.38134e-09	9.51574e-08	up			novel	NM_172307		Mbtps2	sense overlapping		42942
chr12	24930021	24930220		diffreps_peak_7261		8.26959		199		chr12:24878191-24941156+			329.9	5.37543e-09	9.51574e-08	up			novel	NM_026037		Mboat2	sense overlapping		62966
chr17	74242141	74242520		diffreps_peak_16358		8.2784		379		chr17:74201057-74245087-			326.4	5.26742e-09	9.51574e-08	up	17_74644427_74600397_-44030|11.47|10|17		PMID:25714049	NM_133771		Memo1	sense overlapping		44031
chr2	62785921	62786300		diffreps_peak_20038		8.2784		379		chr2:62764571-62837260-			326.4	5.26742e-09	9.51574e-08	up	2_62675317_62602628_-72689|12.61|9|11		PMID:25714049	NM_133207		Kcnh7	sense overlapping		72690
	down.groupA_vs_groupC differentially methylated RNA sites
bed format information of differentially methylated RNA sites									differentially methylated RNA			comparison information					Annotations
chrom	txStart		txEnd		PeakID		score		Peak_length		circRNA	Foldchange		P_value	FDR	Regulation	circBaseID	source		best_transcript	GeneName			Catalog	predicted_sequence_length
chr9	120464681		120464961		diffreps_peak_37792		7.74883		280		chr9:120453564-120464961+	2401		1.78309e-08	1.57513e-07	down	9_120374079_120362682_-11397|16.79|9|22	PMID:25714049		NM_144557	Myrip			sense overlapping	11398
chr8	41255995		41256110		diffreps_peak_34375		8.39258		115		chr8:41255996-41261181+	1694.4		4.04971e-09	9.51574e-08	down		novel		NM_023662	Pcm1			exonic	802
chr17	13849107		13849160		diffreps_peak_15337		8.39719		53		chr17:13808932-13861855+	1546.7		4.00696e-09	9.51574e-08	down		novel		NM_010806	Mllt4			exonic	2664
chr18	77871768		77871848		diffreps_peak_17848		8.38111		80		chr18:77870347-77879416+	1543.1		4.15806e-09	9.51574e-08	down		novel		NM_013831	Pstpip2			exonic	599
chr16	5026507		5026600		diffreps_peak_13641		8.39783		93		chr16:5019287-5048786-	1448.6		4.00106e-09	9.51574e-08	down		novel		NM_028720	Glyr1			exonic	1223
chr4	76246752		76246860		diffreps_peak_25298		8.48328		108		chr4:76243645-76246898-	1392		3.28641e-09	9.51574e-08	down	4_75892802_75889549_-3253|19.16|5|7	PMID:25714049		NM_011211	Ptprd			exonic	288
chr6	38441601		38442080		diffreps_peak_29635		8.45141		479		chr6:38440455-38502408+	1383.5		3.53666e-09	9.51574e-08	down	6_38452408_38390455_-61953|11.84|11|21	PMID:25714049		NM_177185	Ubn2			sense overlapping	61954
chr5	20230861		20231200		diffreps_peak_26960		8.40321		339		chr5:20215319-20284310+	1363.3		3.95177e-09	9.51574e-08	down		novel		NM_015823		Magi2	sense overlapping		68992
chr10	80834841		80835160		diffreps_peak_4009		8.41353		319		chr10:80834313-80836141-	1308.2		3.85896e-09	9.51574e-08	down	10_80298886_80297058_-1828|19.56|4|4	PMID:25714049		NM_001013758		Lingo3	sense overlapping		1829
chr5	53170356		53170497		diffreps_peak_27601		11.3971		141		chr5:53154171-53174869-	1301.7		4.00799e-12	6.91812e-10	down	5_53566108_53545410_-20698|19.15|2|2	PMID:25714049		NM_172710		Sel1l3	exonic		799
chr13	17764953		17765040		diffreps_peak_8925		8.39926		87		chr13:17738917-17772957-	1256.1		3.9879e-09	9.51574e-08	down	mmu_circ_0000432	circBase		NM_027118		Cdk13	exonic		1566
chr13	67636881		67637420		diffreps_peak_9608		8.40186		539		chr13:67623468-67671611-	1240.6		3.96408e-09	9.51574e-08	down		novel		NM_183146		Zfp729a	sense overlapping		48144
chr7	62069561		62070080		diffreps_peak_32388		7.99182		519		chr7:61974996-62070616-	1220.3		1.01901e-08	1.20625e-07	down	7_69215502_69119882_-95620|17.18|4|7	PMID:25714049		NR_015599		A330076H08Rik	sense overlapping		95621
chr11	60262648		60262780		diffreps_peak_5740		7.9053		132		chr11:60258856-60280283-	1201.4		1.24366e-08	1.25603e-07	down	11_60093785_60072358_-21427|19.10|6|8	PMID:25714049		NM_153080		Tom1l2	exonic		725
chr2	181631930		181632087		diffreps_peak_22028		8.35378		157		chr2:181631435-181632087+	1197.7		4.42817e-09	9.51574e-08	down	2_181366792_181366140_-652|15.70|16|36	PMID:25714049		NM_133701		Prpf6	exonic		252
chrX	75816083		75816247		diffreps_peak_38605		9.64335		164		chrX:75799395-75826953-	1197		2.27328e-10	2.54741e-08	down		novel		NM_145629		Pls3	exonic		995
chr6	115573301		115573960		diffreps_peak_30861		8.50694		659		chr6:115553991-115578244+	1195.1		3.11214e-09	9.51574e-08	down		novel		NM_199033		Tsen2	sense overlapping		24254
chr19	27396021		27396560		diffreps_peak_18417		8.29829		539		chr19:27386618-27399821-	1194		5.03167e-09	9.51574e-08	down	19_27474311_27461108_-13203|16.22|6|10	PMID:25714049		NM_177474		D19Bwg1357e	sense overlapping		13204
chr17	24574381		24574580		diffreps_peak_15538		8.4058		199		chr17:24568626-24581758+	1170.9		3.92828e-09	9.51574e-08	down		novel		NM_013630		Pkd1	exonic		7527
chr17	33137881		33138380		diffreps_peak_15715		7.87721		499		chr17:33136424-33138822-	1163.9		1.32675e-08	1.32377e-07	down	17_33275767_33273369_-2398|18.40|3|3	PMID:25714049		uc008byb.2		Zfp955a	intronic		2399
chr1	75390978		75391122		diffreps_peak_1136		12.7917		144		chr1:75387798-75391944+	1161.7		1.61561e-13	5.41935e-11	down		novel		NM_007463		Speg	exonic		1634
chr3	97753015		97753120		diffreps_peak_23390		7.94044		105		chr3:97724089-97754545-	1161.2		1.14699e-08	1.21543e-07	down		novel		NM_001039376		Pde4dip	exonic		1790
chr12	75087404		75087580		diffreps_peak_7974		8.52178		176		chr12:75087405-75087831-	1147.9		3.00758e-09	9.51574e-08	down	12_76188818_76188392_-426|18.17|5|7	PMID:25714049		NM_172805		Kcnh5	exonic		427
chr15	73257033		73257238		diffreps_peak_12953		12.7718		205		chr15:73236152-73276913-	1125.9		1.69121e-13	5.5992e-11	down	15_73107343_73066582_-40761|17.48|7|7	PMID:25714049		NM_007982		Ptk2	exonic		1052
chr14	84492561		84492820		diffreps_peak_11492		8.40413		259		chr14:84477323-84533871+	1117.4		3.9434e-09	9.51574e-08	down		novel		NM_001013753		Pcdh17	sense overlapping		56549
chr1	68328067		68328200		diffreps_peak_1039		8.42958		133		chr1:68305845-68396315-	1112.1		3.71897e-09	9.51574e-08	down			novel	NM_010154		Erbb4	exonic		1295
chr2	30972981		30973340		diffreps_peak_19531		8.45928		359		chr2:30972751-30974037-	1100.9		3.47309e-09	9.51574e-08	down			novel	NM_144885		BC005624	sense overlapping		1287
chr18	43571053		43571194		diffreps_peak_17385		7.88417		141		chr18:43546945-43577509-	1080.6		1.30565e-08	1.30741e-07	down	18_43737163_43706599_-30564|18.00|7|9		PMID:25714049	NM_001163637		Jakmip2	exonic		1719
chr5	111338301		111338428		diffreps_peak_28305		8.41952		127		chr5:111335495-111349574+	1039.6		3.80609e-09	9.51574e-08	down	5_111778594_111764515_-14079|16.37|13|51		PMID:25714049	NM_019640		Pitpnb	exonic		436
chr7	60802121		60802860		diffreps_peak_32335		8.40656		739		chr7:60785638-60834432-	1039.3		3.92141e-09	9.51574e-08	down			novel	TCONS_00029105		XLOC_021648	antisense		48795
chr11	77559741		77560000		diffreps_peak_6094		8.40309		259		chr11:77550872-77605638-	1023.9		3.9528e-09	9.51574e-08	down	11_77419140_77364374_-54766|12.26|2|2		PMID:25714049	NM_144825		Taok1	sense overlapping		54767
chr14	103184831		103184940		diffreps_peak_11685		8.31884		109		chr14:103169857-103243216-	1013		4.79911e-09	9.51574e-08	down			novel	NM_207215		Mycbp2	exonic		4940
chr14	77582521		77582629		diffreps_peak_11432		8.41077		108		chr14:77578964-77592992+	1007.6		3.88353e-09	9.51574e-08	down	14_77992799_77978771_-14028|15.18|11|38		PMID:25714049	NM_172813		Enox1	exonic		654
chrX	120399401		120399600		diffreps_peak_39217		8.40273		199		chrX:120364786-120401897+	993.1		3.95614e-09	9.51574e-08	down	X_117515506_117478395_-37111|17.91|6|6		PMID:25714049	NR_073451		Pcdh11x	exonic		3080
chr13	94479781		94479874		diffreps_peak_9973		8.38452		93		chr13:94450953-94479874+	983.2		4.12554e-09	9.51574e-08	down			novel	NM_009680		Ap3b1	exonic		1049
chr17	58593981		58594497		diffreps_peak_16137		11.3203		516		chr17:58593660-58594497+	981.8		4.78289e-12	8.043e-10	down			novel	ENSMUST00000050706		Gm5815	sense overlapping		838
chr11	49883661		49883860		diffreps_peak_5496		8.43811		199	chr11:49878231-49885262+		981.6		3.64659e-09	9.51574e-08	down			novel	NM_016961		Mapk9	sense overlapping		7032
chr17	24904961		24905280		diffreps_peak_15548		7.8821		319	chr17:24903313-24913632-		979.4		1.3119e-08	1.31255e-07	down			novel	NM_013931		Mapk8ip3	sense overlapping		10320
chr5	20246821		20247200		diffreps_peak_26961		7.97844		379	chr5:20215319-20284310+		967.1		1.0509e-08	1.20625e-07	down			novel	NM_015823		Magi2	sense overlapping		68992
chr12	25016921		25017052		diffreps_peak_7264		8.92969		131	chr12:25013297-25054034+		953.5		1.17574e-09	9.51574e-08	down			novel	NM_001081378		Kidins220	exonic		1419
chr4	109366281		109366480		diffreps_peak_25765		8.34911		199	chr4:109343284-109385562+		949.2		4.47597e-09	9.51574e-08	down	4_109058167_109015889_-42278|12.54|5|5		PMID:25714049	NM_007943		Eps15	sense overlapping		42279
chr5	76980287		76980431		diffreps_peak_27878		7.93851		144	chr5:76980288-76980626+		947.4		1.15211e-08	1.21543e-07	down	5_77409651_77409313_-338|12.35|3|4		PMID:25714049	NM_025691		Srp72	exonic		256
chr11	106548713		106548914		diffreps_peak_6679		13.3908		201	chr11:106529262-106568627-		945.4		4.06587e-14	2.17014e-11	down	11_106429941_106390576_-39365|20.75|7|8		PMID:25714049	NM_198292		Tex2	exonic		2699
chr13	68699721		68700100		diffreps_peak_9627		8.40542		379	chr13:68640710-68738948-		945.1		3.93167e-09	9.51574e-08	down			novel	NM_153534		Adcy2	sense overlapping		98239
chr6	31151941		31152140		diffreps_peak_29531		8.40243		199	chr6:31093363-31181149-		937.9		3.95881e-09	9.51574e-08	down	6_31131149_31043363_-87786|19.72|6|8		PMID:25714049	NR_110469		Lincpint	sense overlapping		87787
chr17	24093190		24093287		diffreps_peak_15516		8.41166		97	chr17:24088004-24100908-		934.2		3.8756e-09	9.51574e-08	down	17_24237875_24224971_-12904|13.41|11|16		PMID:25714049	NM_011062		Pdpk1	exonic		732
chr1	22580741		22581000		diffreps_peak_374		8.4065		259	chr1:22533399-22596581-		929.3		3.92195e-09	9.51574e-08	down			novel	NM_001012623		Rims1	sense overlapping		63183
chr5	117867801		117867926		diffreps_peak_28440		10.9614		125	chr5:117866839-117879410+		927.3		1.09283e-11	1.65025e-09	down			novel	uc008zfx.3		Nos1	exonic		1215
chr13	91526741		91527200		diffreps_peak_9923		7.99098		459	chr13:91524585-91564713+		917.2		1.02098e-08	1.20625e-07	down	13_91704318_91664190_-40128|12.96|10|17		PMID:25714049	NM_024186		Ssbp2	sense overlapping		40129
chr6	120961582		120961729		diffreps_peak_30986		8.41397		147	chr6:120951301-121009181-		905.2		3.85507e-09	9.51574e-08	down			novel	NM_001270475		Mical3	exonic		3382
